# Supplementary material
Source: PubMed Central journal article supplement (PMC7724532)
Supplement: sj-pdf-1-ueg-10.1177_2050640620964132.pdf [file sj-pdf-1-ueg-10.1177_2050640620964132.pdf]

Supplemental Figure 1

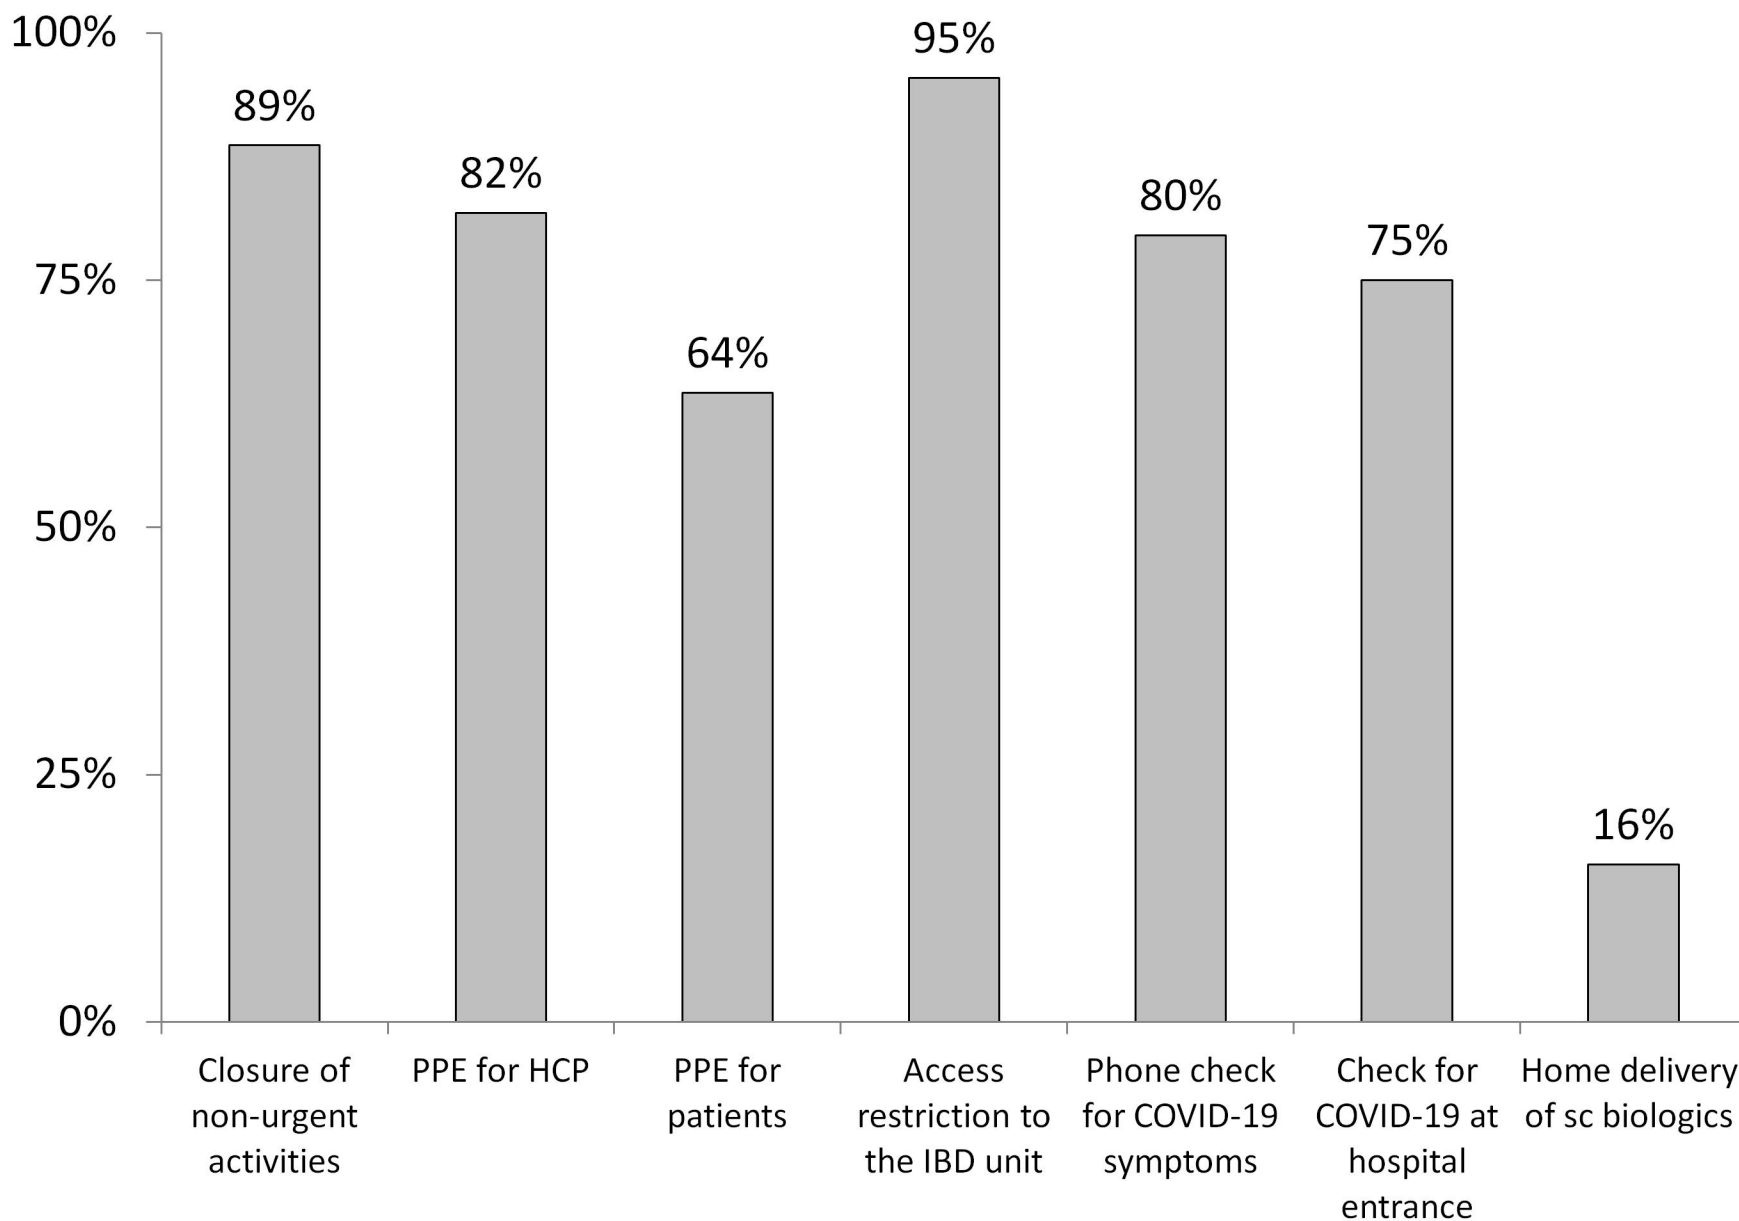

PPE=Personal Protective Equipment; HCP=Health Care Personnel; sc=subcutaneous
